# Supplementary material for: Probing a highly efficient dual mode: down–upconversion luminescence and temperature sensing performance of rare-earth oxide phosphors
Source: Royal Society of Chemistry journal article supplement (doi:10.1039/c2dt32054a), 2012-10-09
Supplement: c2dt32054a.pdf [file c2dt32054a.pdf]

## Supporting Information

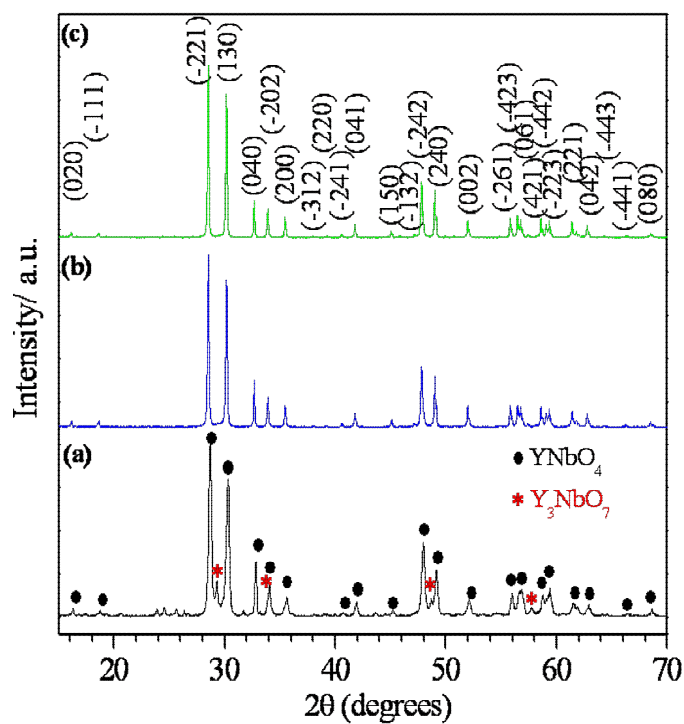

**Fig. S1** Powder XRD patterns of **a)**  $\text{YNbO}_4$ , calcined at 1473 K for 2h, **b)**  $\text{YNbO}_4$ , calcined at 1623 K for 2h, and **c)**  $\text{Y}_{0.977}\text{Yb}_{0.02}\text{Er}_{0.003}\text{NbO}_4$ , calcined at 1623 K for 2h.

**Table S1** Elemental analysis of  $\text{Y}_{0.977}\text{Yb}_{0.02}\text{Er}_{0.003}\text{NbO}_4$  phosphor

| Element        | Atomic %   |          | Deviation |
|----------------|------------|----------|-----------|
|                | Calculated | Observed |           |
| Yttrium (Y)    | 16.28      | 15.08    | -1.20     |
| Ytterbium (Yb) | 0.33       | 0.46     | +0.13     |
| Erbium (Er)    | 0.05       | 0.14     | +0.09     |
| Niobium (Nb)   | 16.66      | 15.25    | -1.41     |
| Oxygen (O)     | 66.67      | 69.11    | +2.44     |
